1 **Title:** Comparative analysis of corrected tiger genome provides clues to their neuronal evolution

2 Authors: Parul Mittal<sup>1</sup>, Shubham Jaiswal<sup>1</sup>, Nagarjun Vijay<sup>2</sup>, Rituja Saxena<sup>1</sup>, Vineet K. Sharma<sup>1\*</sup>

3 **Affiliation:**

4 <sup>1</sup>Metagenomics and Systems Biology Group, Department of Biological Sciences, Indian Institute of  
5 Science Education and Research Bhopal, Bhopal, India

6 <sup>2</sup>Computational Evolutionary Genomics Lab, Department of Biological Sciences, Indian Institute of  
7 Science Education and Research Bhopal, Bhopal, India

8

9 \*Corresponding author email:

10 vineetks@iiserb.ac.in

11

12 Email address of authors:

13 Parul Mittal - parulm@iiserb.ac.in; Shubham K. Jaiswal - shubhamj@iiserb.ac.in; Nagarjun Vijay -

14 nagarjun@iiserb.ac.in; Rituja Saxena - ritus@iiserb.ac.in; Vineet K. Sharma - vineetks@iiserb.ac.in

15 **Abstract**

16 The availability of completed and draft genome assemblies of tiger, leopard, and other felids  
17 provides an opportunity to gain comparative insights on their unique evolutionary adaptations.  
18 However, genome-wide comparative analyses are very sensitive to errors in genome sequences and  
19 thus require accurate genomic assemblies for reliable evolutionary insights. In this study, while  
20 analyzing the tiger genome, we found almost one million erroneous substitutions in the coding and  
21 non-coding region of the genome affecting 4,472 genes, hence, biasing the current understanding of  
22 tiger evolution. Moreover, these errors produced several misleading observations in previous  
23 studies. Thus, to gain insights into the tiger evolution, we corrected the erroneous bases in the  
24 genome assembly and gene set of tiger, which was also validated by resequencing of a Bengal tiger  
25 genome and transcriptome. A comprehensive evolutionary analysis was performed using 10,920  
26 orthologs from nine mammalian species including the corrected gene sets of tiger and leopard, and  
27 using five different methods at three hierarchical levels i.e. felids, Panthera, and tiger. The unique  
28 genetic changes in tiger revealed that the genes showing the signatures of adaptation in tiger were  
29 enriched in development and neuronal functioning. Specifically, the genes belonging to Notch  
30 signalling pathway, which is among the most conserved pathways involved in embryonic and  
31 neuronal development, were found to be significantly diverged in tiger in comparison to the other  
32 mammals. Our findings suggest the role of adaptive evolution in neuronal functions and  
33 development processes, which correlates well with the presence of exceptional traits such as  
34 sensory perception, strong neuro-muscular coordination, and hypercarnivorous behavior in tiger.

35 **Keywords:** Tiger genome, adaptive evolution, comparative genomics, Panthera, felids, genome  
36 correction.

## 37 INTRODUCTION

38 The advancement in genomic sequencing technologies has provided a tremendous impetus for  
39 studying the molecular and genetic basis of adaptive evolution. A recent accomplishment is the  
40 genome sequencing of tiger, the largest felid and a model species to identify the molecular  
41 adaptations to hypercarnivory<sup>1-3</sup>. Tiger is a prominent member of the big cats, which are the  
42 topmost predators in the food chain, and play a key role in the ecological niche<sup>4</sup>. It is a solitary  
43 animal with extraordinary muscle strength and predatory capabilities<sup>2,3</sup>. The tiger genome  
44 sequencing revealed several molecular signatures of selection, particularly the rapid evolution in  
45 genes related to muscle strength, energy metabolism, and sensory nerves<sup>1</sup>. Similar studies in felids,  
46 including the tiger, had also shown strong positive selection in genes related to sensory perception  
47 and neurotransmitters<sup>5</sup>.

48 While genome sequences are indispensable for comparative genome-wide evolutionary studies,  
49 quality of a genome is crucial for such analyses and in deriving reliable inferences<sup>6-9</sup>. The quality of a  
50 genomic assembly is commonly assessed based on the N50 values of contigs and scaffolds and does  
51 not account for single nucleotide errors, which are mainly introduced by the read error correction  
52 tools or *de novo* assembler<sup>10-15</sup>. Such sequence errors in genomes can produce drastically misleading  
53 results in comparative genomic and evolutionary studies<sup>7,8</sup>. We found a similar case in the tiger  
54 genome assembly reported by Cho et al. in 2013<sup>1</sup> and available at Ensembl release 94 (PanTig1.0)<sup>16</sup>  
55 and NCBI. The presence of several erroneous single nucleotide substitutions in the assembly bias the  
56 current understanding of the tiger evolution.

57 Therefore, to perform a comprehensive genome-wide analysis of tiger, we sequenced the genome  
58 and transcriptome of a male Bengal tiger and corrected the errors in the earlier-reported tiger  
59 genome assembly. Using the corrected genome assembly and gene set of tiger, we carried out a  
60 comparative genomic analysis of tiger with several other mammalian species, which provided novel  
61 insights into the adaptive evolution of the lineage leading to tiger.

## 62 **METHODS**

### 63 **Sample collection, DNA isolation, and sequencing of the Bengal tiger genome**

64 Approximately 5-6 ml blood was drawn from the tail vein of a four years old male tiger at Van Vihar  
65 National Park, Bhopal, India and was collected in EDTA-coated vials. The fresh blood sample was  
66 immediately brought to the laboratory at 4 °C and genomic DNA was extracted using DNeasy Blood  
67 and Tissue Kit (Qiagen, USA) following the manufacturer's protocol. Multiple shotgun genomic  
68 libraries were prepared using Illumina TruSeq DNA PCR-free library preparation kit and Nextera XT  
69 sample preparation kit (Illumina Inc., USA) as per the manufacturer's instructions. The insert size for  
70 the TruSeq libraries was 350 and 550 bp, and the average insert size for Nextera XT libraries was  
71 ~650 bp. The insert size for both the libraries was assessed on 2100 Bioanalyzer using High  
72 Sensitivity DNA kit (Agilent, USA). The libraries were quantified using KAPA SYBR FAST qPCR Master  
73 mix with Illumina standards and primer premix (KAPA Biosystems, USA), and Qubit dsDNA HS kit on  
74 a Qubit 2.0 fluorometer (Life Technologies, USA) as per the recommended Illumina protocol. The  
75 normalised TruSeq 550 bp and Nextera XT libraries were loaded on Illumina NextSeq 500 platform  
76 using NextSeq 500/550 v2 sequencing reagent kit (Illumina Inc., USA) and 150 bp paired-end  
77 sequencing was performed. The TruSeq libraries of 350 bp were sequenced on Illumina HiSeq  
78 platform to generate 250 bp paired-end reads.

### 79 **RNA isolation and transcriptome sequencing**

80 Total RNA extraction was carried out from the blood sample for transcriptomic analysis. The blood  
81 sample (~5 ml) was transferred into a 50 ml polypropylene conical centrifuge tube. The volume was  
82 brought up to 45 ml with 1x RBC Lysis Buffer (10x RBC Lysis Buffer: 89.9 g NH<sub>4</sub>Cl, 10.0 g KHCO<sub>3</sub> and  
83 2.0 ml 0.5 M EDTA dissolved in approximately 800 ml ddH<sub>2</sub>O and pH adjusted to 7.3) and incubated  
84 at room temperature for 10 minutes. The cells were pelleted at 600xg (~1,400 rpm) for 10 minutes  
85 in a room temperature centrifuge and the supernatant was discarded. The pellet was gently

86 resuspended in 1 ml of RBC Lysis Buffer and transferred to a 1.5 ml microcentrifuge tube and  
87 incubated at room temperature for 5 minutes. The cells were pelleted for 2 minutes by centrifuging  
88 at room temperature at 3000 rpm. The supernatant was discarded, and the pellet was resuspended  
89 in 1 ml of sterile DPBS. The cells were again pelleted at room temperature at 3,000 rpm, and the  
90 supernatant was discarded. 1200  $\mu$ l of TRIzol solution was added to each tube. 0.2 ml of chloroform  
91 was added, and the tube was vortexed for 15 seconds. The sample was then centrifuged at 13,000  
92 rpm for 10 minutes at 4°C. The upper phase was removed and transferred to a clean microcentrifuge  
93 tube. To the remaining upper phase, an equal volume of cold isopropanol was added, and inverted  
94 to mix. The sample was placed in a -20°C freezer to precipitate. Sample was then centrifuged at  
95 13,000 rpm for 10 minutes at 4°C. The supernatant was carefully discarded, and the pellet was  
96 rinsed with 0.5 ml of ice-cold 75% ethanol. The sample was centrifuged at 13,000 rpm for 10  
97 minutes at 4°C. The supernatant was discarded, and the pellet was allowed to dry for 5 to 10  
98 minutes to remove any remaining ethanol. The RNA pellet was dissolved by adding 20  $\mu$ l of RNase-  
99 free water. The transcriptomic libraries were prepared from the total RNA using the SMARTer  
100 universal low input RNA kit and TruSeq RNA sample prep kit v2 using the manufacturer's  
101 instructions, and 100 bp paired end sequencing was performed on the Illumina HiSeq platform.

## 102 **Data download and preparation**

103 For assembly correction, the latest assemblies of tiger (*Panthera tigris altaica*) and leopard  
104 (*Panthera pardus*) genome were retrieved from Ensembl release 94 (PanTig1.0 and PanPar1.0) <sup>16</sup>.  
105 The reads data was retrieved from NCBI SRA with Accession SRX272981, SRX272988, SRX272991,  
106 SRX272997, SRX273000, SRX273020 and SRX273023 for Amur tiger. For leopard, the reads data with  
107 SRA Accession SRX1495683, SRX1495735, and SRX1495737 were retrieved from NCBI SRA. To  
108 construct the corrected CDS, the reference gtf was downloaded from Ensembl release 94 (*Panthera*  
109 *pardus* 1.0.93 and *Panthera tigris altaica* 1.0.93) <sup>16</sup>. The retrieved raw reads of Amur tiger were  
110 mapped to the tiger reference assembly and raw reads of leopard were mapped to the leopard

111 genome assembly using bwa mem (v0.7.12)<sup>17</sup> using default parameters. The alignment file was  
112 sorted and split scaffold-wise using Samtools (v1.4)<sup>18</sup>.

### 113 **Genomic and CDS correction**

114 The per-nucleotide metrics for each scaffold was calculated using bam-readcount tool  
115 (github/genome/bam-readcount) using minimum mapping quality 25, minimum base quality 25, and  
116 maximum depth 400. The base positions with less than 10x coverage or more than 200x coverage, or  
117 percent indel > 10% were filtered out to remove the low coverage, potentially repetitive, and indel  
118 regions, respectively, and the remaining bases were analyzed further. At a given position, if the  
119 representation of the reference base was less than one-fifth of the most frequent base, then the  
120 reference base was replaced by the most frequent base at that position. The adoption of this  
121 stringent criteria ensured that only those positions were corrected where a sufficient coverage of  
122 the most frequent base relative to the reference base was available to justify the replacement of the  
123 reference base. The above criteria were optimized after several iterations and visualization of  
124 randomly selected regions with the mapped reads in the IGV software<sup>19</sup>. The corrected genome  
125 assembly was used to construct the corrected gene set using the gene structure information  
126 available at Ensembl.

### 127 **Orthologous gene set construction**

128 An orthologous gene set was constructed using nine species – *Homo sapiens* (human), *Mus musculus*  
129 (mouse), *Bos taurus* (cat), *Equus caballus* (horse), *Canis familiaris* (dog), *Mustela putorius* (ferret),  
130 *Felis catus* (cat), *Panthera tigris altaica* (tiger) and *Panthera pardus* (leopard). The gene sets were  
131 retrieved from Ensembl release 94 (Cat: Felis\_catus\_9.0, Cow: UMD3.1, Dog: CanFam3.1, Horse:  
132 EquCab2, Human: GRCh38, Ferret: MusPutFur1.0, Mouse: Mus\_musculus.GRCm38)<sup>16</sup>. The corrected  
133 gene sets of tiger and leopard were used in the analysis. Information on one-to-one orthologs for  
134 the above species was retrieved from BioMart (Ensembl browser 94)<sup>20</sup>.

135 *Protein and nucleotide alignment*

136 The one-to-one orthologs were filtered for the presence of premature stop codons (non-sense  
137 mutations). The gene phylogeny of each ortholog was inferred from the species phylogeny and was  
138 subjected to protein alignment using SATé-II<sup>21</sup>, which implemented PRANK for alignment, Muscle  
139 for merging the alignment, and RAxML for tree estimation. The protein-based nucleotide alignment  
140 was carried out using 'tranalign' tool in EMBOSS package<sup>22</sup>.

141 **Evolutionary analysis**

142 *Higher branch dN/dS*

143 The variation in  $\omega$  ratio between lineages on individual genes was calculated using the branch model  
144 in CodeML from the PAML software package (v4.9a)<sup>23</sup>. The codons with any ambiguity site were  
145 removed from the analyses. The genes that qualified likelihood ratio test using a conservative 5%  
146 false-discovery-rate criterion against the null model (One ratio) were considered for further analysis.  
147 Also, the genes with dN/dS values >3 were not used for further analysis<sup>24,25</sup>. The genes having a  
148 higher branch dN/dS values for foreground lineage compared to the background lineage were  
149 considered to show divergence (HBW: higher branch omega).

150 *Positively selected genes and sites*

151 To identify positively selected genes, a branch-site model was used in PAML software package  
152 (v4.9a)<sup>23</sup>. The codons with any ambiguity site among the nine species were removed from the  
153 analyses. The genes that qualified the likelihood ratio test against the null model (fixed omega) with  
154 5% false-discovery-rate were considered as positively selected genes (PSG). The sites with greater  
155 than 0.95 probability value for foreground lineages in Bayes Empirical Bayes analysis were  
156 considered as positively selected sites (PSS).

157 *Unique substitutions and functional impact*

158 Unique substitutions in amino acid in tiger were identified using the aligned protein sequences. The  
159 positions identical in all species but different in tiger were considered as a unique substitution in  
160 tiger. Any gap or unknown position was ignored. Five sites around any gap in the protein alignment  
161 were also ignored from the analysis. Unique substitutions in Panthera and felids were identified  
162 using the same approach. Functional impact of the substitutions were identified using Sorting  
163 Intolerant From Tolerant (SIFT) <sup>26</sup> tool and the UniProt database <sup>27</sup> was used for reference.

#### 164 *Higher nucleotide divergence*

165 The maximum likelihood phylogenetic tree for each gene using its CDS alignments was constructed  
166 using PhyML package v3.1 <sup>28</sup>. The root-to-tip branch length distances were calculated for each  
167 species using the 'adephylo' package in R <sup>29,30</sup>. The genes with a significantly higher root-to-tip  
168 branch length for lineage leading to tiger compared to all other lineages were considered to show  
169 higher nucleotide divergence in tiger.

#### 170 *Identification of genes with multiple signs of adaptation*

171 Genes showing more than two signs of adaptive divergence among the five signs (Unique  
172 substitution, higher dN/dS, positive selection, positively selected sites, and higher nucleotide  
173 divergence) used in the study were considered to be the genes with multiple signs of adaptation  
174 (MSA). Enrichment of MSA genes was carried out using WebGeStalt web server <sup>31</sup>. The GO  
175 enrichment with p-value < 0.05 in over-representation enrichment analysis were considered to be  
176 enriched. The eggNOG analysis of the MSA genes was performed using the eggNOG v4.5.1 <sup>32</sup>. The  
177 network-based pathway enrichment analysis was carried out based on the methodology  
178 implemented in EnrichNet <sup>33</sup> to identify the network interconnectivity score (XD-score) and classical  
179 overlap-based enrichment score (Fisher's exact test adj. using Benjamini-Hochberg) using KEGG as  
180 the reference database. The significance threshold was calculated by performing a linear regression



181 of network interconnectivity score (XD-score) and enrichment score (Fisher's q-value). The pathways  
182 above the significance threshold were considered as enriched.

183

## 184 **RESULTS**

185 Comparative genomic analysis was performed to gain insights into the evolution of tiger with several  
186 other mammalian species. Tiger is a prominent member of the *Panthera* genus, which is a fast  
187 evolving group that has undergone recent radiation with rapid functional diversification<sup>34-36</sup>. Thus,  
188 the comparative genome-wide study of tiger with respect to the closely related *Panthera* species  
189 and other mammals is likely to provide novel evolutionary insights into their adaptive evolution. The  
190 tiger genome assembly, reported by Cho et al. in 2013 (available at <http://tigergenome.org>), was  
191 retrieved and used for the comparative analysis. During the analysis, we observed that the assembly  
192 comprised of several erroneous single base substitutions, which were perhaps introduced by the *de*  
193 *novo* assembler or by the read correction tools (**Supplementary Text S1**)<sup>10-15</sup>. Similar errors were  
194 also present in the genome assembly of tiger, NCBI (GCA\_000464555.1) and Ensembl (PanTig1.0). As  
195 observed from the analysis performed using the publicly available tiger genome assembly presented  
196 in the **Supplementary Text S1**, the above errors produced several misleading results  
197 (**Supplementary Figure S1-S2**). For example, BEX3, a gene that plays an important role in the  
198 neuronal apoptosis<sup>37,38</sup> was found to be positively selected and showed nine unique amino acid  
199 substitutions in tiger. Our analysis revealed that eight of the nine substitutions in this gene were due  
200 to the single nucleotide errors in the publicly available genome assembly of tiger, which produced  
201 the incorrect result shown in **Supplementary Figure S2**. We found several such cases in previous  
202 studies where the erroneous single nucleotide substitutions have led to incorrect evolutionary  
203 interpretations (**Supplementary Text S2, Figure S3-S4**).

204 Therefore, to understand the adaptive evolution of tiger lineage, we first corrected the available  
205 reference assembly of the tiger genome, which was further validated by sequencing the genome and  
206 transcriptome of a Bengal tiger from India. A total of 175,680,850 paired-end reads (67 GB) and  
207 32,252,904 reads (6 GB) were generated for the genome and transcriptome, respectively  
208 **(Supplementary Table S1-S2)**. Among the five extant species in the *Panthera* genus, the genome  
209 assemblies are publicly available for only two species, tiger and leopard<sup>1,39</sup>. Thus, in addition to  
210 tiger, we also generated the corrected genome assembly of leopard using the strategy shown in  
211 **Figure 1a**, and briefly mentioned below.

### 212 **Correcting the genome assembly and gene set of tiger and leopard**

213 The genomic reads were mapped to the tiger genome assembly obtained from Ensembl (PanTig1.0),  
214 and the incorrect positions in the assembly were identified using the read alignments. We developed  
215 a pipeline, named 'SeqBug', for genome assembly corrections for single nucleotide errors introduced  
216 primarily by the read error correction or *de novo* assembler. The method is based on the mapping of  
217 high-depth short reads to the genome assembly followed by the identification of an incorrect base-  
218 pair and its correction. A given base-pair was considered 'incorrect' if it had 20% or less  
219 representation than any other base in the read alignments among all the mapped reads. The  
220 detailed criteria used for base correction is provided in **Methods**. A total of 982,606 bases (0.04% of  
221 the genome) were corrected in tiger assembly. The distribution of per-base coverage of these  
222 corrected positions showed a Poisson distribution (with a peak on the low coverage side) in  
223 comparison to the normal distribution for the whole genome (**Figure 1b**), suggesting that a larger  
224 number of corrections were made in the low coverage regions.

225 The corrected genome assembly was used to construct the corrected gene set for tiger as per the  
226 gene structure information available at Ensembl release 94. A total of 14,145 codons corresponding  
227 to 6,273 transcripts and 4,472 genes were corrected. Of these, 3,686 genes (21%) had non-  
228 synonymous, and 1,623 genes (9.3%) had synonymous corrections. Not surprisingly, most of the

229 corrected bases in the coding region of genes in tiger were found identical to the corresponding  
230 base present in the cat gene orthologs, which validates the correction methodology.

231 We also corrected the leopard genome assembly using the same approach. A total of 58,566 bases  
232 (0.002% of the genome) were corrected. The corrections in the coding regions mapped to 194  
233 codons in 165 transcripts corresponding to 125 genes, of which 40 genes had synonymous changes  
234 and 43 genes had non-synonymous changes. It is apparent that much fewer corrections were made  
235 in the leopard genome assembly in comparison to the tiger assembly. This was expected because  
236 the leopard genome was sequenced at a very high (~300X) coverage compared to tiger (~100X), and  
237 the mapping-based correction was already performed by the authors<sup>9,39</sup>. Fewer corrections in the  
238 leopard genome assembly also indicate that the error correction method used in this study was  
239 specific enough to identify and correct only the erroneous positions. The corrected assemblies and  
240 gene sets of tiger and leopard were utilized to identify the molecular signatures underlying the  
241 adaptive evolution of tiger lineage.

## 242 **Adaptive evolution analysis**

243 We performed the adaptive evolution analysis for the lineage leading to tiger using five methods: A)  
244 Higher dN/dS using branch model: to identify genes with higher rate of evolution, B) High nucleotide  
245 substitution: to identify genes with a high rate of mutation by comparing root-to-tip branch lengths,  
246 C) Positive selection using the branch-site model: to identify genes with positive selection in the  
247 selected clade, D) Unique substitution with functional impact: to identify genes with unique  
248 substitution in the selected clade that have significant impact on the protein function, and E)  
249 Positively selected amino acid sites: to identify the positively selected sites in a gene. The analysis  
250 was performed using nine mammalian species, including the corrected gene set of leopard and tiger,  
251 and the high-quality annotated gene sets of seven species (human, mouse, cow, horse, cat, ferret,  
252 dog) retrieved from Ensembl (release 94)<sup>16</sup>. A total of 10,920 one-to-one orthologs for these nine  
253 species were identified using Ensembl BioMart<sup>20</sup>. The phylogenetic tree for these species was

254 derived using the tree published by Nyakatura et al., 2012<sup>40</sup> by employing the tree subset  
255 methodology from the “ape” package of R statistical software<sup>41</sup> (**Figure 2a**). The adaptive evolution  
256 analysis for the lineage leading to tiger provided several new insights into the felid, Panthera and  
257 tiger evolution.

### 258 *Insights into felid evolution*

259 Recent studies in felids have identified evolutionary signatures that are important for their unique  
260 sensory perception and hunting characteristics<sup>1,5,34,39,42</sup>. However, these studies were performed  
261 using the previous gene set (from Cho et. al 2013) of tiger, which contained erroneous base  
262 substitutions that can potentially bias the findings. Thus, the usage of corrected tiger gene set in this  
263 study is expected to identify the signatures of adaptive evolution in felids. A total of 766 genes  
264 showed faster evolution and 906 genes showed positive selection in felid in comparison to the other  
265 mammals. These genes showed enrichment for biological functions such as sensory perception,  
266 neuronal functioning, cell signalling, development, and stress response (**Figure 2b**). The lists of  
267 statistically significant top-20 GO categories from the two analyses are provided in **Supplementary**  
268 **Table S3**. Several genes that previously showed adaptive evolution in felids could not be identified in  
269 this study, whereas many additional genes were found to be evolved in felid (**Supplementary Text**  
270 **S2**). However, previous studies on the evolution of felids have also reported positive selection and  
271 adaptive evolution in the genes involved in the sensory perception and neuronal functioning<sup>5</sup>. This  
272 indicates that in terms of the broader biological processes, the results from the evolutionary analysis  
273 using the corrected genome assemblies corroborate with the previous study on felids<sup>5</sup>.

274 We observed several felid-specific amino acid substitutions in the AgRP gene expressed in AGRP  
275 neurons, which is involved in regulating the feeding behavior in animals<sup>43-45</sup>. The injection of AgRP  
276 peptides into the brain in rats was found to induce voracious eating behavior even in well-fed mice.  
277 AgRP polymorphisms have been associated with diet, leanness, obesity, type-2 diabetes and  
278 anorexia nervosa<sup>45-47</sup>. The felid-specific unique substitutions in the AgRP gene were also found to

279 have significant functional impact predicted using SIFT, and thus, could be associated with the  
280 voracious feeding behavior shown by felids<sup>48,49</sup>.

### 281 *Insights into Panthera evolution*

282 The Panthera genus has shown a recent and rapid diversification, which now comprises of five  
283 species of modern big cats possessing several unique characteristics. To understand the genetic-  
284 basis of divergence within these species and as well as with respect to the other mammalian species,  
285 we performed the comparative evolutionary analysis of Panthera considering tiger and leopard, with  
286 seven other mammalian species. The analysis resulted in a total of 1,450 genes showing positive  
287 selection in Panthera, which were functionally enriched in sensory perception, regulation of protein  
288 serine/threonine kinase activity, gene expression regulation, stress response, and development. A  
289 total of 917 genes showed a faster rate of evolution (branch model), and were enriched in cell-cell  
290 signalling and early development functions. Further, 797 genes showed amino acid substitutions  
291 unique to Panthera with significant functional impact. These genes were enriched in the biological  
292 functions related to sperm motility, development, fatty acid metabolism, and DNA repair. The lists of  
293 statistically significant top-20 GO categories from the three analyses are provided in **Supplementary**  
294 **Table S4**. A previous study in Panthera had reported unique substitutions with functional impact in  
295 fatty acid metabolism and DNA repair categories<sup>1</sup>, which were also observed in this study.

### 296 *Insights into tiger evolution*

297 A comprehensive analysis of the five types of evolutionary signals was performed using the gene  
298 orthologs identified from nine mammalian species to gain insights into the evolution of tiger. A total  
299 of 1,474 genes showed positive selection in tiger (branch-site model) and were enriched for  
300 functional categories such as early development, fatty acid metabolism and neuronal functioning  
301 (**Supplementary Table S5**). A total of 872 genes showed faster evolution in tiger (branch model) and  
302 were mainly enriched for functions related to organ development and sensory perception

303 **(Supplementary Table S6)**. A total of 1,158 genes showed unique substitutions with functional  
304 impact and were enriched for cell signalling, sensory perception, and cytoskeleton functions  
305 **(Supplementary Table S7)**. A total of 151 genes showed high nucleotide divergence rate identified  
306 using root-to-tip branch length values in tiger. These genes were enriched for sensory perception,  
307 organ development, and neuronal related functions **(Supplementary Table S8)**.

### 308 **Insights into the evolution of tiger using genes with multiple signs of adaptation**

309 The genes with multiple signs of adaptation (MSA) were identified as the genes that showed three or  
310 more signs of adaptive evolution out of the five methods used for the adaptive evolution analysis (A.  
311 Higher dN/dS analysis using the branch model, B. High nucleotide substitution, C. Positive selection  
312 using the branch-site model, D. Unique substitution with functional impact, and E. Positively  
313 selected amino acid sites). A total of 955 genes showed MSA in tiger in comparison to all the other  
314 species including the closely related leopard genome. A total of 83 genes had all the five signs of  
315 adaptive evolution, and a maximum of 348 genes showed four signs of adaptive evolution including  
316 higher branch dN/dS, positive selection, unique substitution with functional impact, and positively  
317 selected sites.

318 Among the five signatures of adaptive evolution used in this study, the higher branch dN/dS, positive  
319 selection, and higher nucleotide divergence can identify the 'gene-wide' signals of evolution,  
320 suggesting that the complete gene is evolving. On the other hand, unique substitution with  
321 functional impact and positively selected sites indicate the evolution of only specific sites in the  
322 gene, thus can identify the 'site-specific' signals of evolution. Among the MSA, seven genes did not  
323 show positive selection (gene-wide signal) in tiger, though they had statistically significant positively  
324 selected amino acid sites (site-specific signal), suggesting that the effect of these positively selected  
325 sites was masked by the sites evolving under purifying selection or neutrality. Thus, the usage of five  
326 different evolutionary analyses helped to identify both site-specific and gene-wide signals of  
327 evolution in genes. Using these methods, among the MSA genes, a total of 111 genes showed all the

328 three gene-wide signals of evolution, and a total of 580 genes showed the two site-specific signals of  
329 evolution in tiger (**Figure 3a**).

### 330 *Evolution of developmental and neuronal processes in tiger*

331 The GO enrichment for the MSA genes was performed to identify the underlying biological processes  
332 of genes showing adaptive evolution, and the enriched categories ( $p$ -value < 0.01) were visualized as  
333 a network using Cytoscape v3.2.1<sup>50</sup>. The nodes in the network represent the individual GO  
334 categories, and the width of edges represents the number of shared genes among the GO categories  
335 (**Figure 3b**). It is interesting to note that one-third of the enriched categories were involved in  
336 neuronal functioning and development. The genes in these categories perform diverse functions  
337 such as regulation, cellular component organization, developmental process, nervous system  
338 process, and response to stimulus (**Figure 3b**). It is also apparent from the network that several GO  
339 categories, including neuronal-related functions, belonged to a broader GO term “Developmental  
340 process”. These GO categories showed dense connections with each other, which indicates that a  
341 large number of genes are common among these functional categories. This suggests that these  
342 developmental genes with adaptive divergence in tiger have pleiotropic functions, where one gene  
343 can regulate multiple developmental processes. Further, the eggNOG classification of the MSA genes  
344 revealed ‘signal transduction mechanisms’ as the most enriched category (**Supplementary Table S9**).  
345 Taken together, it points towards the differential evolution of neuronal functioning and  
346 developmental processes genes in tiger.

### 347 *The highly evolved Notch signalling pathway in tigers*

348 The pathway enrichment analysis performed using the fisher’s exact test and network enrichment  
349 method revealed the Notch signalling pathway to be the most significantly enriched pathway  
350 (**Supplementary Table S10**). The regression of XD-score, which is a measure of network  
351 interconnectivity, and Fisher’s test (with Benjamini-Hochberg adjusted  $q$ -value) also revealed that

352 after applying these tests, only the Notch signalling pathway was above the significance threshold  
353 (**Figure 4a**). This kind of framework for the pathway enrichment is more accurate than the classical  
354 overrepresentation-based method, as it also includes the protein interaction network information<sup>33</sup>.  
355 In the Notch signalling pathway, 11 genes showed adaptive evolution in tiger among which, CTBP1  
356 gene showed all the five signs of adaptation. The 11 genes include the notch receptor (NOTCH3),  
357 ligand (DLL3), intracellular and extracellular regulators (DVL3, NUMB, LFNG, ADAM17), transcription  
358 factor (RBPJL), and its regulators (CREBBP, NCOR2, CTBP1). From the protein-protein interaction  
359 data obtained from STRING database<sup>51</sup>, it was apparent that these 11 genes can interact with all the  
360 genes and regulators of the Notch pathway (**Figure 4b and 4c**). Taken together, it is apparent that  
361 every crucial step of the Notch signalling pathway has evolved in tiger in comparison to the other  
362 mammalian species, including the close relative leopard. The genes of this pathway are  
363 evolutionarily conserved in multi-cellular organisms and regulate the cell-fate determination and  
364 tissue homeostasis, thus play an important role in embryonic development<sup>52,53</sup>. Using the juxtacrine  
365 signalling method it regulates the development and functioning of cardiac, neuronal, immune, and  
366 endocrine system<sup>53-55</sup>. The tissue expression data from GNF Atlas<sup>56</sup> revealed that these 11  
367 adaptively evolved Notch pathway genes also show high expression in the temporal lobe, whole  
368 brain, cerebellum peduncles, and prostate (**Supplementary Table S11**). Thus, the evolution of Notch  
369 signalling relates well with the differential neural morphology observed in tiger in comparison to the  
370 other mammals<sup>57,58</sup>.

371

## 372 **DISCUSSION**

373 Genome sequencing followed by genome-wide comparative analysis has become a powerful tool to  
374 study the patterns of evolution in different lineages. The genome sequencing of tiger has provided  
375 novel insights into their unique adaptations and divergence from other species, and among its  
376 subspecies. The genome sequencing of tiger is significant since it is a part of charismatic megafauna



377 that has captivated human interest, is the largest felid, and is among one of the most endangered  
378 species with less than 4,000 individuals remaining in the wild <sup>59</sup>.

379 In this study, while using the publicly available genome sequence assembly of tiger, we found that  
380 the assembly consisted of several errors, which also led to several incorrect interpretations in recent  
381 other studies. For example, Figueiro et al., 2017 identified that the ESRP1 gene, important for  
382 craniofacial robustness, has a positively selected I298Y substitution in jaguar <sup>34</sup>. This substitution was  
383 found to be positively selected in jaguar due to the presence of “I” in the respective ortholog in  
384 tiger, which was a result of single nucleotide error in the tiger genome assembly (**Supplementary**  
385 **Figure 3 and 4**). From the above example and the other cases described in the **Supplementary Text**,  
386 it is apparent that evolutionary studies are very sensitive to nucleotide errors present in the genome  
387 assemblies and gene sets, where even single nucleotide errors can produce drastically misleading  
388 results in the analyses.

389 Thus, to understand the adaptive evolution of the lineage leading to tiger, the publicly available tiger  
390 genome assembly was corrected for such single nucleotide errors using the ‘SeqBug’ pipeline  
391 developed in this study and validated using the resequencing data of a new male Bengal tiger  
392 genome and transcriptome. The identification of errors in 4,472 genes and 982,606 bases (0.04%  
393 genome) in the tiger genome put forth the need of the correction. Further, the incorrect positions  
394 were mostly present in regions of low coverage (<30) and were much fewer in the leopard genome  
395 that was sequenced at three times higher coverage than tiger <sup>9,39</sup>. These observations underscore  
396 the need for a higher genome coverage along with mapping-based correction to produce a more  
397 accurate assembly. The genome sequence of another tiger individual sequenced in this study and  
398 the construction of corrected genome sequence and gene set of tiger are likely to be beneficial for  
399 further comparative studies.

400 After correction, most of the bases corrected in the coding genome of tiger were identical to the  
401 corresponding bases in the cat genome, thus, validating our correction methodology. This further

402 indicates that the divergence time of tiger calculated using the genetic differences in the previous  
403 studies could suffer from an over-estimation because of these erroneous substitutions<sup>8</sup>. Considering  
404 errors of 0.9 million bases and mutation rate of 1.1e-09 per base per year for tiger<sup>1</sup>, the estimated  
405 divergence time of tiger can be affected by 0.37 million years.

406 The usage of corrected tiger and leopard coding genome, a large number of orthologs, and five  
407 different evolutionary analysis in this study, makes the evolutionary assessments more reliable, and  
408 was also successful in revealing the signatures of adaptive divergence in felids, Panthera and tiger  
409 lineages. Previous reports identified evolutionary adaptations in genes related to muscle strength,  
410 hypercarnivorous diet, sensory perception, and craniofacial and limb development in the  
411 Panthera/Felidae lineage<sup>1,5,34,39</sup>. Similar categories were also found to be adaptively evolved in the  
412 Panthera/Felidae lineage in this study. However, large differences in the gene sets were observed,  
413 which further highlights the impact of incorrect genomes on the evolutionary analysis.

414 One of the unique finding was the enrichment of neuronal functioning and developmental processes  
415 in genes showing multiple signs of adaptive evolution in tiger. Notably, the Notch signalling pathway  
416 emerged as the most diverged pathway in tiger, which was not found as adaptively evolved in the  
417 previous studies. The observation is significant since the Notch pathway plays key roles in diverse  
418 developmental processes including neurogenesis, neural differentiation, and cell fate determination  
419<sup>53,60</sup>. Also, the observed divergence at almost every step of Notch signalling pathway, which is a  
420 highly conserved pathway throughout the animal kingdom, further indicates the adaptive evolution  
421 in neuronal functioning and development genes in tiger.

422 The evolution of the neuronal related genes in the tiger lineage is informative but not very surprising  
423 given their unique physiological and behavioral characteristics<sup>2,3,49,61-63</sup>. Several studies show that  
424 the feeding, drinking, aggression, predation and sexual behavior, and the energy homeostasis of an  
425 organism are primarily governed by neuronal circuitry<sup>43,44,64-66</sup>. The felids, particularly the big cats  
426 being the large hypercarnivores, show a very distinct aggressive and predatory behavior. They

427 require strong neuro-muscular coordination, sensory perception and timed actions for successful  
428 hunting <sup>49,67</sup>. Thus, it is tempting to speculate the role of evolution in the neural development and  
429 processes for attaining unique phenotypes, behavior, and dietary patterns. This notion also gets  
430 support from the previous studies that showed differences in neuronal morphology in tiger in  
431 comparison to other mammals, including its closest relative leopard <sup>57,58</sup>. The dendrites of typical  
432 pyramidal neurons in tiger are very complex, and the dendritic measures of these neurons are  
433 disproportionately large relative to body/brain size <sup>58</sup>. To summarize, the identification of adaptive  
434 evolution in the neuronal functioning genes in tiger indicates the plausible role of evolution in neural  
435 processes in achieving exceptional sensory perception, neuro-muscular coordination, faster reflex  
436 actions, predatory capabilities and hypercarnivorous behavior in tiger.

437

#### 438 **DATA ACCESSIBILITY**

439 The sequence data of the Bengal tiger genome and transcriptome will be made publicly available on  
440 acceptance of the manuscript. The corrected genome assemblies, gene sets, and correction pipeline  
441 'SeqBug' developed in this study are available from the corresponding author on reasonable request.

442

#### 443 **FIGURES**

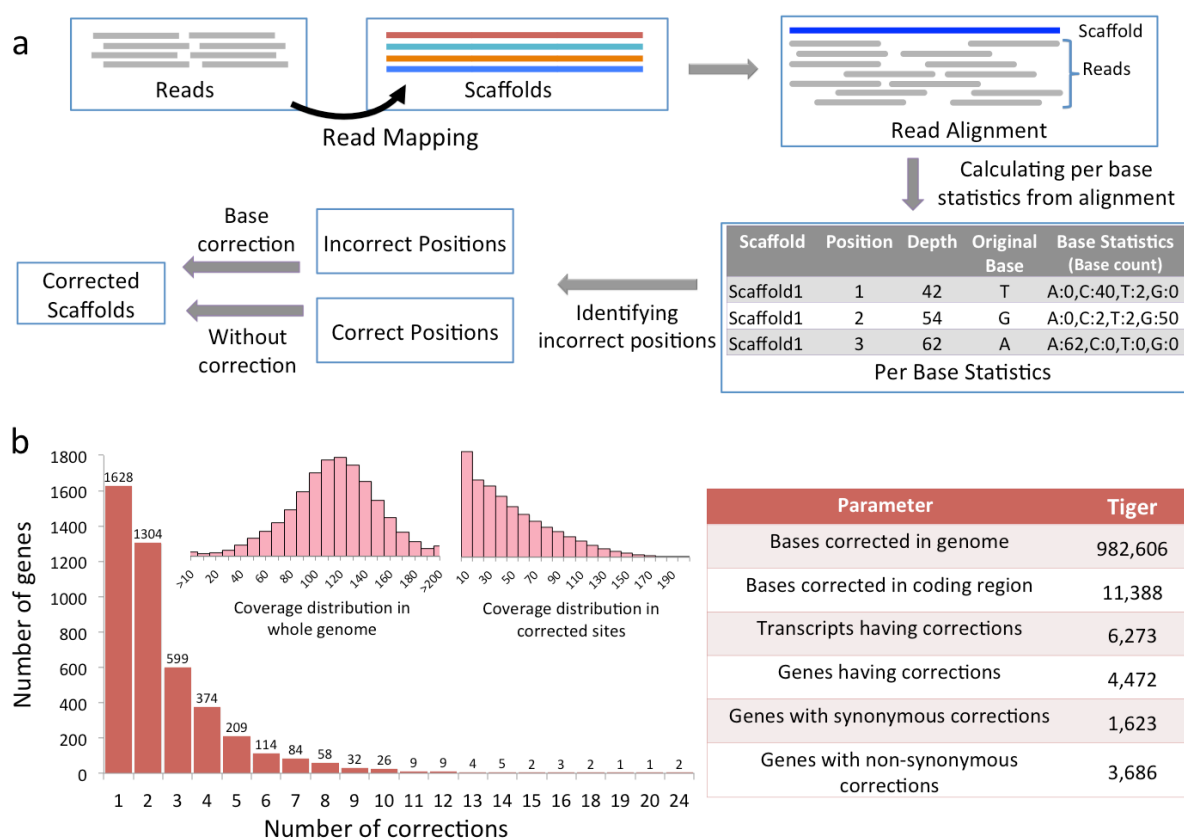

444

445 **Figure 1. Correction in the tiger genome.** **a** Workflow of methods used to identify erroneous sites in  
 446 the tiger genome assembly and their corrections. **b** The main bar plot represents the number of  
 447 genes and the number of sites corrected in each gene. The left inset bar plot represents the  
 448 distribution of coverage of each position in the tiger genome, and the right inset bar plot represents  
 449 the distribution of coverage of only the corrected sites in the genome assembly. The table in the  
 450 right represent the correction statistics for the tiger genome assembly.

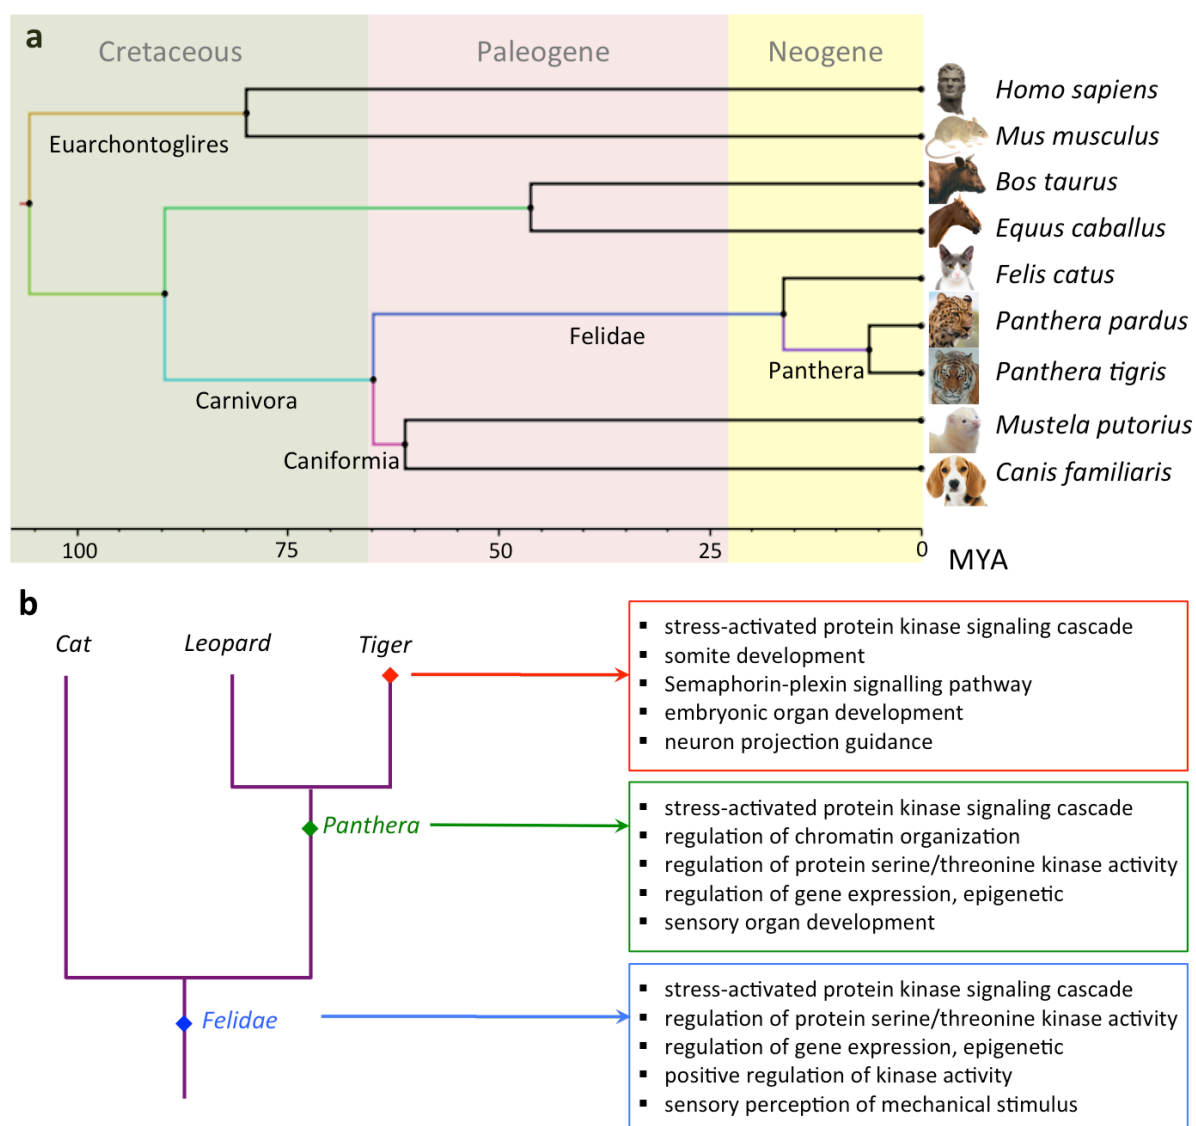

451

452 **Figure 2. Phylogeny and positive selection in the lineage leading to tiger.** **a** The phylogenetic tree of  
 453 the nine mammalian species used in the study. **b** The top five enriched GO categories of positively  
 454 selected genes identified in felid, Panthera and tiger lineages.

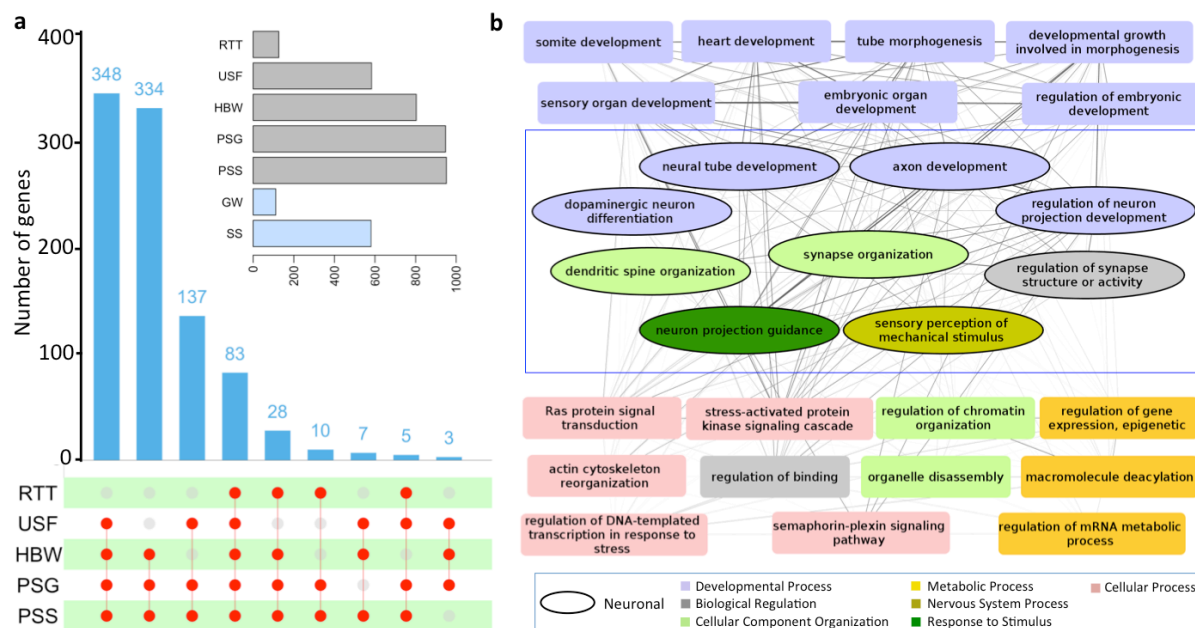

455

456 **Figure 3. The genes showing multiple signatures of adaptation in tiger.** **a** The upSet plot of the  
 457 number of genes shared by the combination of the five methods used to test for adaptive evolution.  
 458 The matrix layout was constructed using the upSET package in R<sup>68</sup>. The connection between the red  
 459 circles shows the intersection of different methods with the intersection value depicted as a bar  
 460 plot. RTT: higher root-to-tip branch length, USF: Unique substitution with functional impact, HBW:  
 461 Higher branch dN/dS ( $\omega$ ), PSG: Positively selected genes, PSS: Positively selected sites, GW: Gene-  
 462 wide, SS: Site-specific. Gene-wide (GW) represents the genes showing all three signs of adaptation  
 463 among the MSA (HBW, RTT, PSG), which takes into account the evolution of the complete gene. Site-  
 464 specific (SS) represents the genes showing the two signs of adaptation among the MSA (USF and  
 465 PSS), which takes into account the evolution of specific sites in a gene. **b** Network diagram of GO  
 466 biological processes enriched ( $p$ -value < 0.01) in the MSA genes. The nodes represent the GO  
 467 biological processes, and the edges represent the number of MSA genes shared among the enriched  
 468 categories.

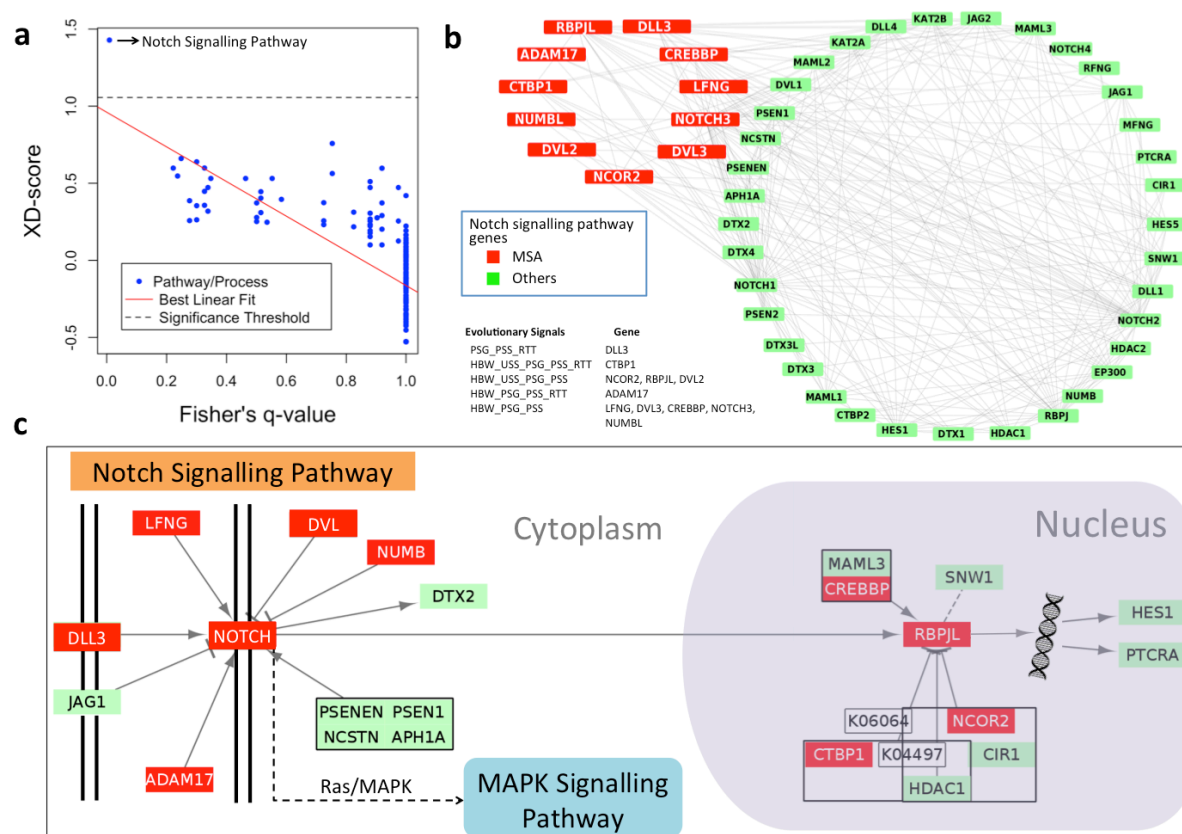

469

470 **Figure 4. The adaptive divergence of Notch signalling pathway in tiger.** a The regression of XD-score

471 and Fisher's q-value of KEGG pathways. b Network diagram of genes showing the interaction of MSA

472 genes with the rest of the genes of the Notch signalling pathway. The edges in the network

473 represent the protein-protein interactions among the genes obtained from STRING database. c

474 Schematic representation of the Notch signalling pathway from KEGG with the genes showing

475 multiple signatures of adaptation highlighted in Red. The pathway diagram was constructed using

476 KEGGscope plug-in<sup>69</sup> in Cytoscape.

477

478 **LIST OF ABBREVIATIONS**

|     |                                             |
|-----|---------------------------------------------|
| USF | Unique substitutions with functional impact |
|-----|---------------------------------------------|

|       |                                         |
|-------|-----------------------------------------|
| PSG   | Postively selected genes                |
| PSS   | Postively selected sites                |
| HBW   | Higher branch dN/dS                     |
| BEX3  | Brain expressed gene 3                  |
| AgRP  | Agouti related neuropeptide             |
| ESRP1 | Epithelial splicing regulatory protein1 |

479

480

481 **CONFLICT OF INTEREST**

482 The authors declare that the research was conducted in the absence of any commercial or financial  
483 relationships that could be construed as a potential conflict of interest.

484

485 **ACKNOWLEDGMENT**

486 We thank Dr. Atul Gupta, Wildlife Veterinary Officer, Van Vihar National Park, Bhopal, and Director,  
487 Van Vihar National Park, Bhopal, India for providing the blood samples of tiger. We also  
488 acknowledge the help of Drs. Tista Joseph and Niraj Dahe, Wildlife Veterinary Officers (Wildlife SOS  
489 India) at Van Vihar National Park for carrying out the sample collection procedure. We thank the HPC



490 facility and NGS facility at IISER Bhopal. SKJ and RS thank the Department of Science and Technology  
491 for the DST-INSPIRE fellowship. We also thank the intramural research funds provided by IISER  
492 Bhopal.

493

#### 494 **AUTHOR'S CONTRIBUTION**

495 VKS conceived and coordinated the project. RS prepared the DNA samples and performed genome  
496 sequencing. PM and SKJ generated the corrected genome assemblies and gene sets. PM performed  
497 the branch dN/dS, positive selection, unique substitution and SIFT analyses. SKJ performed the  
498 higher nucleotide divergence analysis. PM, SKJ, NV, and VKS analyzed the data and wrote the  
499 manuscript. PM created figures. All the authors have read and approved the final manuscript.

## References

- 1 Cho, Y. S. *et al.* The tiger genome and comparative analysis with lion and snow leopard genomes. *Nat Commun* **4**, 2433, doi:10.1038/ncomms3433 (2013).
- 2 Mazak, V. *Panthera tigris*. *Mammalian species*, 1-8 (1981).
- 3 Seidensticker, J. & McDougal, C. Tiger predatory behavior, ecology and conservation. (1993).
- 4 Terborgh, J. *et al.* The role of top carnivores in regulating terrestrial ecosystems. (1999).
- 5 Montague, M. J. *et al.* Comparative analysis of the domestic cat genome reveals genetic signatures underlying feline biology and domestication. *Proc Natl Acad Sci U S A* **111**, 17230-17235, doi:10.1073/pnas.1410083111 (2014).
- 6 Denton, J. F. *et al.* Extensive error in the number of genes inferred from draft genome assemblies. *PLoS Comput Biol* **10**, e1003998, doi:10.1371/journal.pcbi.1003998 (2014).
- 7 Prosdocimi, F., Linard, B., Pontarotti, P., Poch, O. & Thompson, J. D. Controversies in modern evolutionary biology: the imperative for error detection and quality control. *BMC Genomics* **13**, 5, doi:10.1186/1471-2164-13-5 (2012).
- 8 Clark, A. G. & Whittam, T. S. Sequencing errors and molecular evolutionary analysis. *Molecular Biology and Evolution* **9**, 744-752 (1992).
- 9 Hubisz, M. J., Lin, M. F., Kellis, M. & Siepel, A. Error and error mitigation in low-coverage genome assemblies. *PLoS one* **6**, e17034 (2011).
- 10 Heydari, M., Miclotte, G., Demeester, P., Van de Peer, Y. & Fostier, J. Evaluation of the impact of Illumina error correction tools on de novo genome assembly. *BMC Bioinformatics* **18**, 374, doi:10.1186/s12859-017-1784-8 (2017).
- 11 Yang, X., Chockalingam, S. P. & Aluru, S. A survey of error-correction methods for next-generation sequencing. *Brief Bioinform* **14**, 56-66, doi:10.1093/bib/bbs015 (2013).
- 12 Salzberg, S. L. *et al.* GAGE: A critical evaluation of genome assemblies and assembly algorithms. *Genome Res* **22**, 557-567, doi:10.1101/gr.131383.111 (2012).
- 13 Del Angel, V. D. *et al.* Ten steps to get started in Genome Assembly and Annotation. *F1000Research* **7** (2018).
- 14 Walker, B. J. *et al.* Pilon: an integrated tool for comprehensive microbial variant detection and genome assembly improvement. *PLoS one* **9**, e112963 (2014).
- 15 Ronen, R., Boucher, C., Chitsaz, H. & Pevzner, P. SEQuel: improving the accuracy of genome assemblies. *Bioinformatics* **28**, i188-i196 (2012).
- 16 Cunningham, F. *et al.* Ensembl 2019. *Nucleic acids research* **47**, D745-D751 (2018).
- 17 Li, H. Aligning sequence reads, clone sequences and assembly contigs with BWA-MEM. *arXiv preprint arXiv:1303.3997* (2013).
- 18 Li, H. *et al.* The sequence alignment/map format and SAMtools. *Bioinformatics* **25**, 2078-2079 (2009).
- 19 Thorvaldsdottir, H., Robinson, J. T. & Mesirov, J. P. Integrative Genomics Viewer (IGV): high-performance genomics data visualization and exploration. *Brief Bioinform* **14**, 178-192, doi:10.1093/bib/bbs017 (2013).

- 20 Kasprzyk, A. BioMart: driving a paradigm change in biological data management. *Database (Oxford)* **2011**, bar049, doi:10.1093/database/bar049 (2011).
- 21 Liu, K. *et al.* SATe-II: very fast and accurate simultaneous estimation of multiple sequence alignments and phylogenetic trees. *Systematic biology* **61**, 90-106 (2011).
- 22 Rice, P., Longden, I. & Bleasby, A. EMBOSS: the European molecular biology open software suite. *Trends in genetics* **16**, 276-277 (2000).
- 23 Yang, Z. PAML 4: phylogenetic analysis by maximum likelihood. *Molecular biology and evolution* **24**, 1586-1591 (2007).
- 24 Uebbing, S. *et al.* Divergence in gene expression within and between two closely related flycatcher species. *Molecular ecology* **25**, 2015-2028 (2016).
- 25 Axelsson, E. *et al.* Natural selection in avian protein-coding genes expressed in brain. *Mol Ecol* **17**, 3008-3017, doi:10.1111/j.1365-294X.2008.03795.x (2008).
- 26 Ng, P. C. & Henikoff, S. SIFT: Predicting amino acid changes that affect protein function. *Nucleic Acids Res* **31**, 3812-3814 (2003).
- 27 UniProt Consortium, T. UniProt: the universal protein knowledgebase. *Nucleic Acids Res* **46**, 2699, doi:10.1093/nar/gky092 (2018).
- 28 Guindon, S. *et al.* New algorithms and methods to estimate maximum-likelihood phylogenies: assessing the performance of PhyML 3.0. *Syst Biol* **59**, 307-321, doi:10.1093/sysbio/syq010 (2010).
- 29 Jombart, T., Dray, S. & Dray, M. S. Package 'adephylo'. (2017).
- 30 Jombart, T. & Dray, S. adephylo: exploratory analyses for the phylogenetic comparative method. *Bioinformatics* **26**, 1-21 (2010).
- 31 Wang, J., Vasaikar, S., Shi, Z., Greer, M. & Zhang, B. WebGestalt 2017: a more comprehensive, powerful, flexible and interactive gene set enrichment analysis toolkit. *Nucleic acids research* **45**, W130-W137 (2017).
- 32 Huerta-Cepas, J. *et al.* eggNOG 4.5: a hierarchical orthology framework with improved functional annotations for eukaryotic, prokaryotic and viral sequences. *Nucleic acids research* **44**, D286-D293 (2015).
- 33 Glaab, E., Baudot, A., Krasnogor, N., Schneider, R. & Valencia, A. EnrichNet: network-based gene set enrichment analysis. *Bioinformatics* **28**, i451-i457, doi:10.1093/bioinformatics/bts389 (2012).
- 34 Figueiro, H. V. *et al.* Genome-wide signatures of complex introgression and adaptive evolution in the big cats. *Sci Adv* **3**, e1700299, doi:10.1126/sciadv.1700299 (2017).
- 35 Johnson, W. E. *et al.* The late Miocene radiation of modern Felidae: a genetic assessment. *Science* **311**, 73-77 (2006).
- 36 Li, G., Davis, B. W., Eizirik, E. & Murphy, W. J. Phylogenomic evidence for ancient hybridization in the genomes of living cats (Felidae). *Genome research* **26**, 1-11 (2016).
- 37 Calvo, L. *et al.* Bex3 Dimerization Regulates NGF-Dependent Neuronal Survival and Differentiation by Enhancing trkA Gene Transcription. *J Neurosci* **35**, 7190-7202, doi:10.1523/JNEUROSCI.4646-14.2015 (2015).
- 38 Yi, J. S., Lee, S. K., Sato, T. A. & Koh, J. Y. Co-induction of p75(NTR) and the associated death executor NADE in degenerating hippocampal neurons after kainate-induced seizures in the rat. *Neurosci Lett* **347**, 126-130 (2003).

- 39 Kim, S. *et al.* Comparison of carnivore, omnivore, and herbivore mammalian genomes with a new leopard assembly. *Genome Biol* **17**, 211, doi:10.1186/s13059-016-1071-4 (2016).
- 40 Nyakatura, K. & Bininda-Emonds, O. R. Updating the evolutionary history of Carnivora (Mammalia): a new species-level supertree complete with divergence time estimates. *BMC Biol* **10**, 12, doi:10.1186/1741-7007-10-12 (2012).
- 41 Paradis, E., Claude, J. & Strimmer, K. APE: analyses of phylogenetics and evolution in R language. *Bioinformatics* **20**, 289-290 (2004).
- 42 Dobrynin, P. *et al.* Genomic legacy of the African cheetah, *Acinonyx jubatus*. *Genome Biol* **16**, 277, doi:10.1186/s13059-015-0837-4 (2015).
- 43 Sternson, S. M. Hypothalamic survival circuits: blueprints for purposive behaviors. *Neuron* **77**, 810-824 (2013).
- 44 Sternson, S. M. & Eiselt, A.-K. Three pillars for the neural control of appetite. *Annual review of physiology* **79**, 401-423 (2017).
- 45 Ilnytska, O. & Argyropoulos, G. The role of the Agouti-Related Protein in energy balance regulation. *Cell Mol Life Sci* **65**, 2721-2731, doi:10.1007/s00018-008-8104-4 (2008).
- 46 Vink, T. *et al.* Association between an agouti-related protein gene polymorphism and anorexia nervosa. *Mol Psychiatry* **6**, 325-328, doi:10.1038/sj.mp.4000854 (2001).
- 47 Marks, D. L. *et al.* Ala67Thr polymorphism in the Agouti-related peptide gene is associated with inherited leanness in humans. *Am J Med Genet A* **126A**, 267-271, doi:10.1002/ajmg.a.20600 (2004).
- 48 Van Valkenburgh, B. & Wayne, R. K. Carnivores. *Curr Biol* **20**, R915-919, doi:10.1016/j.cub.2010.09.013 (2010).
- 49 Sunquist, M. & Sunquist, F. *Wild cats of the world*. (University of Chicago press, 2017).
- 50 Su, G., Morris, J. H., Demchak, B. & Bader, G. D. Biological network exploration with Cytoscape 3. *Curr Protoc Bioinformatics* **47**, 8 13 11-24, doi:10.1002/0471250953.bi0813s47 (2014).
- 51 Snel, B., Lehmann, G., Bork, P. & Huynen, M. A. STRING: a web-server to retrieve and display the repeatedly occurring neighbourhood of a gene. *Nucleic Acids Res* **28**, 3442-3444 (2000).
- 52 Artavanis-Tsakonas, S., Rand, M. D. & Lake, R. J. Notch signaling: cell fate control and signal integration in development. *Science* **284**, 770-776 (1999).
- 53 Lowell, S., Benchoua, A., Heavey, B. & Smith, A. G. Notch promotes neural lineage entry by pluripotent embryonic stem cells. *PLoS Biol* **4**, e121, doi:10.1371/journal.pbio.0040121 (2006).
- 54 Chau, M. D., Tuft, R., Fogarty, K. & Bao, Z. Z. Notch signaling plays a key role in cardiac cell differentiation. *Mech Dev* **123**, 626-640, doi:10.1016/j.mod.2006.06.003 (2006).
- 55 de la Pompa, J. L. *et al.* Conservation of the Notch signalling pathway in mammalian neurogenesis. *Development* **124**, 1139-1148 (1997).
- 56 Su, A. I. *et al.* A gene atlas of the mouse and human protein-encoding transcriptomes. *Proc Natl Acad Sci U S A* **101**, 6062-6067, doi:10.1073/pnas.0400782101 (2004).

- 57 Jacobs, B. *et al.* Comparative morphology of gigantopyramidal neurons in primary motor cortex across mammals. *Journal of Comparative Neurology* **526**, 496-536 (2018).
- 58 Johnson, C. B. *et al.* Neocortical neuronal morphology in the Siberian Tiger (*Panthera tigris altaica*) and the clouded leopard (*Neofelis nebulosa*). *J Comp Neurol* **524**, 3641-3665, doi:10.1002/cne.24022 (2016).
- 59 Seidensticker, J. Saving wild tigers: a case study in biodiversity loss and challenges to be met for recovery beyond 2010. *Integr Zool* **5**, 285-299, doi:10.1111/j.1749-4877.2010.00214.x (2010).
- 60 Wakeham, A. *et al.* Conservation of the Notch signalling pathway in mammalian neurogenesis. *Development* **124**, 1139-1148 (1997).
- 61 Sunquist, M. Ecology, behavior and resilience of the tiger and its conservation needs. *Riding the tiger: tiger conservation in human dominated landscapes*, 5-18 (1999).
- 62 Valkenburgh, B. V. & Ruff, C. Canine tooth strength and killing behavior in large carnivores. *Journal of Zoology* **212**, 379-397 (1987).
- 63 Eisert, R. Hypercarnivory and the brain: protein requirements of cats reconsidered. *J Comp Physiol B* **181**, 1-17, doi:10.1007/s00360-010-0528-0 (2011).
- 64 Panchin, Y. V. *et al.* Neuronal basis of hunting and feeding behavior in the pteropod mollusc *Clione limacina*. *Netherlands journal of zoology* **44**, 170-183 (1993).
- 65 Jennings, J. H. *et al.* Interacting neural ensembles in orbitofrontal cortex for social and feeding behavior. *Nature*, doi:10.1038/s41586-018-0866-8 (2019).
- 66 Han, W. *et al.* Integrated Control of Predatory Hunting by the Central Nucleus of the Amygdala. *Cell* **168**, 311-324 e318, doi:10.1016/j.cell.2016.12.027 (2017).
- 67 Heffner, R. S. & Heffner, H. E. Hearing range of the domestic cat. *Hear Res* **19**, 85-88 (1985).
- 68 Lex, A. & Gehlenborg, N. (Nature Publishing Group, 2014).
- 69 Nishida, K., Ono, K., Kanaya, S. & Takahashi, K. KEGGscape: a Cytoscape app for pathway data integration. *F1000Research* **3** (2014).
